# Supplementary material
Source: PubMed Central journal article supplement (PMC8972153)
Supplement: jamaophthalmol-e220050-s001.pdf [file jamaophthalmol-e220050-s001.pdf]

## Supplementary Online Content

Widyaputri F, Rogers SL, Kandasamy R, Shub A, Symons RCA, Lim LL. Global estimates of diabetic retinopathy prevalence and progression in pregnant women with preexisting diabetes: a systematic review and meta-analysis. *JAMA Ophthalmol*. Published online March 24, 2022. doi:10.1001/jamaophthalmol.2022.0050

**eTable 1.** Systematic Review Search Strategy

**eTable 2.** Methodological and Reporting Quality Scoring

**eTable 3.** Determination of Score Thresholds for High-Quality Studies

**eTable 4.** Quality Score of Included Studies

**eTable 5.** Characteristics of Pregnant Women in Each Study Population

**eTable 6.** Pooled Prevalence of Proliferative Diabetic Retinopathy Around Delivery

**eTable 7.** Pooled Progression Rate of Nonproliferative Diabetic Retinopathy Worsening by at Least 1 Level

**eTable 8.** Comparison of Pooled Estimates Between Freeman-Tukey Double Arcsine Transformation and Random Intercept Mixed-Effects Logistic Regression Model

**eFigure 1.** Systematic Search and Selection of Eligible Literature

**eFigure 2.** Forest Plots of Prevalence of any DR Using Studies With Similar Quality, by Type of Diabetes

**eFigure 3.** Forest Plots of Prevalence of PDR Using Studies With Similar Quality, by Type of Diabetes

**eFigure 4.** Forest Plots of Prevalence of any DR Using Studies With Similar Quality and DR Grading Scheme, by Diabetes Type

**eFigure 5.** Forest Plots of Prevalence of PDR Using Studies With Similar Quality and DR Grading Scheme, by Type of Diabetes

### eReferences

This supplementary material has been provided by the authors to give readers additional information about their work.

**eTable 1.** Systematic Review Search Strategy

| <b>Databases</b> |   |                                                                                                                                                                                                                                                                                                                                                                                |
|------------------|---|--------------------------------------------------------------------------------------------------------------------------------------------------------------------------------------------------------------------------------------------------------------------------------------------------------------------------------------------------------------------------------|
| Medline/OVID     | 1 | diabetic retinopathy.ti,ab. or diabetic retinopathy/ti, ab or diabetic retinopathy/                                                                                                                                                                                                                                                                                            |
|                  | 2 | (pregnant or pregnancy).ti,ab. or pregnancy/                                                                                                                                                                                                                                                                                                                                   |
|                  | 3 | 1 AND 2                                                                                                                                                                                                                                                                                                                                                                        |
|                  | 4 | limit 3 to (english language and humans)                                                                                                                                                                                                                                                                                                                                       |
|                  | 5 | limit 4 to (clinical study or clinical trial, all or clinical trial, phase i or clinical trial, phase ii or clinical trial, phase iii or clinical trial, phase iv or clinical trial or comparative study or controlled clinical trial or journal article or multicenter study or observational study or pragmatic clinical trial or randomized controlled trial or twin study) |
| EMBASE/OVID      | 1 | diabetic retinopathy.ti,ab. or diabetic retinopathy/ti, ab or diabetic retinopathy/                                                                                                                                                                                                                                                                                            |
|                  | 2 | (pregnant or pregnancy).ti,ab. or pregnancy/                                                                                                                                                                                                                                                                                                                                   |
|                  | 3 | 1 AND 2                                                                                                                                                                                                                                                                                                                                                                        |
|                  | 4 | limit 3 to (human and english language and embase)                                                                                                                                                                                                                                                                                                                             |
|                  | 5 | limit 4 to (article and journal)                                                                                                                                                                                                                                                                                                                                               |
| Scopus           | 1 | TITLE-ABS-KEY ("diabetic retinopathy")                                                                                                                                                                                                                                                                                                                                         |
|                  | 2 | TITLE-ABS-KEY (pregnant OR pregnancy)                                                                                                                                                                                                                                                                                                                                          |
|                  | 3 | #1 AND #2                                                                                                                                                                                                                                                                                                                                                                      |
|                  | 4 | #3 (LIMIT-TO (DOCTYPE , "ar")) AND (LIMIT-TO(SRCTYPE,"j")) AND (LIMIT-TO (LANGUAGE, "English"))                                                                                                                                                                                                                                                                                |

**eTable 2.** Methodological and Reporting Quality Scoring

| Item | Quality Criteria                                                                                                                                                                                                                                                                                                                                                                                                                                                                                                          | Score                                                                                                                                                                                                                                                                                                                                                                                                                                                                                                |
|------|---------------------------------------------------------------------------------------------------------------------------------------------------------------------------------------------------------------------------------------------------------------------------------------------------------------------------------------------------------------------------------------------------------------------------------------------------------------------------------------------------------------------------|------------------------------------------------------------------------------------------------------------------------------------------------------------------------------------------------------------------------------------------------------------------------------------------------------------------------------------------------------------------------------------------------------------------------------------------------------------------------------------------------------|
| 1    | Appropriate method of <b>ascertaining diabetes prior to conception</b> . Appropriate inclusion of all persons with diabetes is important for accurate DR prevalence estimates. This may be defined based on a positive laboratory test (i.e., an oral glucose tolerance test or fasting blood glucose) and/or a self-reported history of physician's diagnosis and current diabetes treatment. A review of medical records or use of a national health registry to identify individuals with diabetes is also appropriate | <b>1 point</b> if method specifically described and prior to conception<br><b>0 points</b> if not described<br><br><i>(not included if not prior to conception, GDM excluded)</i>                                                                                                                                                                                                                                                                                                                    |
| 2    | Diabetes type is described and, if a mixture of types included in a study, the <b>data could be extracted separately for T1DM and T2DM</b>                                                                                                                                                                                                                                                                                                                                                                                | 2 points if type is described and DR grading data is published separately by DM type<br>1 point if type described and data can be extracted by type<br>0 if not described                                                                                                                                                                                                                                                                                                                            |
| 3    | Appropriate assessment of outcome. In this case, <b>retinal photography must be performed on all study participants</b> diagnosed with diabetes. <i>Retinal photography should not be limited to participants who have been diagnosed with DR from a clinical examination or where photographs served only as documentation of clinical findings</i>                                                                                                                                                                      | 2 points if all subjects<br>1 point if $\geq 90\%$ of subjects<br>0 if not performed for 90% of subjects or not at all                                                                                                                                                                                                                                                                                                                                                                               |
| 4    | DR assessment: number of <b>eyes per person and retinal fields photographed</b> . <i>Studies that photographed only 1 randomly selected eye may miss detecting DR in the opposite eye. Studies that captured 1 field of 50 to 60-degree of retinal photos, they equal to more than 3 fields<sup>1</sup></i>                                                                                                                                                                                                               | <b>3 points</b> for 3 or more fields/eye and both eyes for <u>all subjects with fundus photography</u> ;<br><b>2 points</b> for 3 or more fields/eye and both eyes for $\geq 90\%$ <u>subjects with fundus photography</u> ;<br><b>2 points</b> of 2 fields/eye and both eyes for <u>all subjects with fundus photography</u> ;<br><b>1 point</b> if only 1 field per eye, and both eyes for <u>all subjects with fundus photography</u> ;<br><b>0 points</b> if no photos or only 1 eye per patient |
| 5    | Photos were graded more than once to reach <b>consensus</b>                                                                                                                                                                                                                                                                                                                                                                                                                                                               | 1 point if graded by graders for consensus<br>0 point if not, or no photos.                                                                                                                                                                                                                                                                                                                                                                                                                          |
| 6    | DR grading was carried out by a dedicated, <b>trained grader or team of trained graders</b>                                                                                                                                                                                                                                                                                                                                                                                                                               | 1 point if use of consistent, trained grader/team for all images<br>0 if many random graders<br>0 if not described                                                                                                                                                                                                                                                                                                                                                                                   |
| 7    | Grading of DR based on <b>standardized protocols</b> and definitions that can be comparable <sup>a</sup> to analysis categories 'none', 'NPDR', 'PDR', such as the ETDRS, modified Airlie House, WESDR, AAO or EURODIAB classification schemes.                                                                                                                                                                                                                                                                           | 2 points if a well-accepted, comparable <sup>a</sup> , grading scheme was used<br>1 point if clearly describes their method but it is some other protocol<br>0 if not described                                                                                                                                                                                                                                                                                                                      |

| Item                                                                                                                                                                                                                                                                                                                                                                                                                                                                                       | Quality Criteria                                                                                                                                                                                                                                                                                                                                                                                     | Score                                                                                                                                                                                                                                                                                                                                                                          |
|--------------------------------------------------------------------------------------------------------------------------------------------------------------------------------------------------------------------------------------------------------------------------------------------------------------------------------------------------------------------------------------------------------------------------------------------------------------------------------------------|------------------------------------------------------------------------------------------------------------------------------------------------------------------------------------------------------------------------------------------------------------------------------------------------------------------------------------------------------------------------------------------------------|--------------------------------------------------------------------------------------------------------------------------------------------------------------------------------------------------------------------------------------------------------------------------------------------------------------------------------------------------------------------------------|
| 8                                                                                                                                                                                                                                                                                                                                                                                                                                                                                          | The <b>timing of baseline eye exam data/results</b> was specifically <b>described</b>                                                                                                                                                                                                                                                                                                                | 1 point if described<br>0 if not described                                                                                                                                                                                                                                                                                                                                     |
|                                                                                                                                                                                                                                                                                                                                                                                                                                                                                            |                                                                                                                                                                                                                                                                                                                                                                                                      | <b>Max total, prevalence: 13 points</b>                                                                                                                                                                                                                                                                                                                                        |
| <b>Extra elements relevant to the progression outcomes</b>                                                                                                                                                                                                                                                                                                                                                                                                                                 |                                                                                                                                                                                                                                                                                                                                                                                                      |                                                                                                                                                                                                                                                                                                                                                                                |
| 9                                                                                                                                                                                                                                                                                                                                                                                                                                                                                          | Appropriate assessment of outcome. In the case of progression outcomes, retinal photography/exam must be <b>performed at the same frequency</b> on all study participants. <i>Retinal photography during follow-up should not be limited to participants who had diagnosed DR at baseline, or the frequency of follow-up photography should be the same in those with and without DR at baseline</i> | 1 point if same frequency for all subjects<br>0 if frequency varied by initial clinical findings<br>0 if unclear or not described                                                                                                                                                                                                                                              |
| 10                                                                                                                                                                                                                                                                                                                                                                                                                                                                                         | <b>NPDR details.</b> DR grading scale has enough subtlety to detect the difference between mild and more severe grades of NPDR (thus the ability to detect progression/worsening <i>within</i> the NPDR grades)                                                                                                                                                                                      | 2 points if follow-up data reported for differing severities of NPDR<br>0 if not reported or not described                                                                                                                                                                                                                                                                     |
| 11                                                                                                                                                                                                                                                                                                                                                                                                                                                                                         | DR grading was carried out <b>over follow-up time</b> by a dedicated, <b>trained grader or team of trained graders</b>                                                                                                                                                                                                                                                                               | 1 point if use of consistent, trained grader/team for all images<br>0 if many random graders<br>0 if not described                                                                                                                                                                                                                                                             |
| 12                                                                                                                                                                                                                                                                                                                                                                                                                                                                                         | The <b>timing of follow-up</b> eye examination data/results was specifically described                                                                                                                                                                                                                                                                                                               | 2 points if described and baseline was 1 <sup>st</sup> trimester (<14 weeks) and follow-up was in the 3 <sup>rd</sup> trimester<br>1 point if timing described and baseline was mostly <22 weeks and follow-up was in the 3 <sup>rd</sup> trimester or just after delivery (<12 weeks post-partum)<br>0 points if not described<br><br><i>(other timepoints were excluded)</i> |
|                                                                                                                                                                                                                                                                                                                                                                                                                                                                                            |                                                                                                                                                                                                                                                                                                                                                                                                      | <b>Max total, progression: 19 points</b>                                                                                                                                                                                                                                                                                                                                       |
| Abbreviations: AAO, American Academy of Ophthalmology; DM, diabetes mellitus; DR, diabetic retinopathy; ETDRS, Early Treatment Diabetic Retinopathy Study; EURODIAB, Epidemiology and Prevention of Diabetes; GDM, gestational diabetes mellitus; NPDR, non-proliferative diabetic retinopathy; PDR, proliferative diabetic retinopathy; T1DM, type 1 diabetes mellitus; T2DM, type 2 diabetes mellitus; UK, United Kingdom; WESDR, Wisconsin Epidemiologic Study of Diabetic Retinopathy. |                                                                                                                                                                                                                                                                                                                                                                                                      |                                                                                                                                                                                                                                                                                                                                                                                |
| <sup>a</sup> National Screening Committee retinopathy standard (UK) specifically not listed as their 'maculopathy' category confuses the retinopathy status.                                                                                                                                                                                                                                                                                                                               |                                                                                                                                                                                                                                                                                                                                                                                                      |                                                                                                                                                                                                                                                                                                                                                                                |

**eTable 3.** Determination of Score Thresholds for High-Quality Studies

|                                              |                                                                                                                                                                                                                                                                                                                                                                                                                                                                                                                                                                                                                                                                                                                                                                                                                                                                                         |
|----------------------------------------------|-----------------------------------------------------------------------------------------------------------------------------------------------------------------------------------------------------------------------------------------------------------------------------------------------------------------------------------------------------------------------------------------------------------------------------------------------------------------------------------------------------------------------------------------------------------------------------------------------------------------------------------------------------------------------------------------------------------------------------------------------------------------------------------------------------------------------------------------------------------------------------------------|
| <b>Objective 1:<br/>Prevalence analysis</b>  | <p>For objective 1, the scoring tool was applied to studies that were eligible for the prevalence analysis. The highest score that a study could receive was 13 points.</p> <p>The median score for studies eligible for objective 1 was 9.5 (IQR 6-10) for prevalence of any DR at Trimester 1, 10 (IQR 8-11) for prevalence of any DR at Trimester 3, 9 (IQR 6-11) for prevalence of PDR at Trimester 1, and 10 (IQR 7-12) for studies eligible for prevalence of PDR at Trimester 3.</p> <p>The threshold of <math>\geq 9/13</math> points was chosen as it covers the median score of each outcome of interest so can be considered to indicate studies that are average or better quality. This choice of threshold does not reject a large proportion of eligible studies from analyses (e.g., only rejects around 25% of eligible studies for Trimester 3 prevalence rates).</p> |
| <b>Objective 2:<br/>Progression analysis</b> | <p>For objective 2, the scoring tool was applied to studies that were eligible for the progression analysis. There was a total of 6 points relating to progression in addition to the earlier 13 points. Thus, the highest score a study could receive was 19 points.</p> <p>The median score for studies eligible for objective 2 was 13 (IQR 12-16) for progression from none to any DR, 12.5 (IQR 11-14) for worsened NPDR, 12.5 (IQR 11-16) for progression from NPDR to PDR, and 12 (IQR 11-14) for worsened PDR.</p> <p>The threshold of <math>\geq 12/19</math> was chosen as this covers the median score for outcomes of interest and rejects only between 20% and 33% of eligible studies depending on the specific progression outcome under assessment.</p>                                                                                                                 |

**eTable 4.** Quality Score of Included Studies

| Study                                                                                                    | qual 1 | qual 2 | qual 3 | qual 4 | qual 5 | qual 6 | qual 7 | qual 8 | qual 9 | qual 10 | qual 11 | qual 12 | Quality score <sup>a</sup> |                |
|----------------------------------------------------------------------------------------------------------|--------|--------|--------|--------|--------|--------|--------|--------|--------|---------|---------|---------|----------------------------|----------------|
|                                                                                                          |        |        |        |        |        |        |        |        |        |         |         |         | 1 <sup>b</sup>             | 2 <sup>c</sup> |
| <b>T1DM only</b>                                                                                         |        |        |        |        |        |        |        |        |        |         |         |         |                            |                |
| Arun, 2008 <sup>2</sup>                                                                                  | 1      | 2      | 2      | 1      | 0      | 1      | 2      | 0      | 0      | 2       | 1       | 1       | 10                         | 14             |
| Axer-Siegel, 1996 <sup>3</sup>                                                                           | 1      | 2      | 2      | 3      | 1      | 1      | 1      | 1      | 1      | 2       | 1       | 0       | 12                         | 16             |
| Buchbinder, 2000 <sup>4</sup>                                                                            | 1      | 2      | 2      | 1      | 0      | 0      | 2      | 1      | 1      | 0       | 0       | 1       | 10                         | 12             |
| Chew, 1995 <sup>5</sup>                                                                                  | 1      | 2      | 2      | 3      | 0      | 1      | 2      | 1      | 1      | 2       | 1       | 1       | 12                         | 17             |
| Dibble, 1982 <sup>6</sup>                                                                                | 1      | 2      | 2      | 1      | 0      | 0      | 1      | 1      | 0      | 0       | 0       | 2       | 10                         | 12             |
| Klein, 1990 <sup>7</sup>                                                                                 | 1      | 2      | 2      | 3      | 0      | 1      | 2      | 1      | 1      | 2       | 1       | 1       | 12                         | 17             |
| Laatikainen, 1980 <sup>8</sup>                                                                           | 1      | 2      | 2      | 1      | 0      | 1      | 1      | 1      | 1      | 0       | 1       | 2       | 9                          | 13             |
| Lapolla, 1998 <sup>9</sup>                                                                               | 1      | 2      | 2      | 1      | 0      | 0      | 2      | 1      | 1      | 2       | 0       | 2       | 11                         | 16             |
| Lauszus, 2003 <sup>10</sup>                                                                              | 1      | 2      | 2      | 3      | 1      | 1      | 2      | 1      | 1      | 2       | 1       | 2       | 13                         | 19             |
| Loukovaara, 2003 <sup>11</sup>                                                                           | 1      | 2      | 2      | 3      | 0      | 1      | 2      | 1      |        |         |         |         | 12                         | NA             |
| McElvy, 2001 <sup>12</sup>                                                                               | 1      | 2      | 2      | 1      | 0      | 1      | 2      | 1      | 1      | 0       | 1       | 1       | 10                         | 13             |
| Moloney, 1982 <sup>13</sup>                                                                              | 1      | 2      | 2      | 3      | 0      | 1      | 1      | 1      |        |         |         |         | 11                         | NA             |
| Phelps, 1986 <sup>14</sup>                                                                               | 1      | 2      | 2      | 2      | 0      | 1      | 2      | 1      | 1      | 0       | 1       | 1       | 11                         | 14             |
| Rahman, 2007 <sup>15</sup>                                                                               | 1      | 2      | 0      | 0      | 0      | 1      | 2      | 1      | 0      | 2       | 1       | 2       | 7                          | 12             |
| Rosenn, 1992 <sup>16</sup>                                                                               | 1      | 2      | 2      | 1      | 0      | 1      | 1      | 1      | 1      | 0       | 1       | 1       | 9                          | 12             |
| Vestgaard, 2010 <sup>17</sup>                                                                            | 1      | 2      | 2      | 3      | 0      | 0      | 2      | 1      | 1      | 0       | 1       | 2       | 10                         | 14             |
| <b>T2DM only</b>                                                                                         |        |        |        |        |        |        |        |        |        |         |         |         |                            |                |
| Rasmussen, 2010 <sup>18</sup>                                                                            | 1      | 2      | 2      | 3      | 0      | 1      | 2      | 1      | 1      | 2       | 1       | 2       | 10                         | 16             |
| <b>Mixture of DM types</b>                                                                               |        |        |        |        |        |        |        |        |        |         |         |         |                            |                |
| Hampshire, 2013 <sup>19</sup>                                                                            | 1      | 2      | 2      | 2      | 1      | 1      | 1      | 0      | 0      | 0       | 1       | 2       | 10                         | 13             |
| Abbreviations: NA, not applicable due to unavailable data; T1DM, type 1 diabetes; T2DM, type 2 diabetes. |        |        |        |        |        |        |        |        |        |         |         |         |                            |                |
| <sup>a</sup> Good quality score: ≥9 for prevalence analysis and ≥12 for progression analysis.            |        |        |        |        |        |        |        |        |        |         |         |         |                            |                |
| <sup>b</sup> Quality score with respect to a prevalence analysis (maximum possible score 13).            |        |        |        |        |        |        |        |        |        |         |         |         |                            |                |
| <sup>c</sup> Quality score with respect to a progression rate analysis (maximum possible score 19).      |        |        |        |        |        |        |        |        |        |         |         |         |                            |                |

**eTable 5.** Characteristics of Pregnant Women in Each Study Population

| Study                          | Subset characteristics | Maternal age (years)<br>mean ± SD                                                      | Mean ± SD HbA1c level (%)                                                               |                                                                                         | Eye exam timing   |                  |
|--------------------------------|------------------------|----------------------------------------------------------------------------------------|-----------------------------------------------------------------------------------------|-----------------------------------------------------------------------------------------|-------------------|------------------|
|                                |                        |                                                                                        | early pregnancy                                                                         | around delivery                                                                         | Early pregnancy   | Late pregnancy   |
| <b>T1DM only</b>               |                        |                                                                                        |                                                                                         |                                                                                         |                   |                  |
| Arun, 2008 <sup>2</sup>        |                        | 29 ± 5                                                                                 | 7.2 ± 1.3                                                                               | 6.7 ± 1.3                                                                               | Trim 1 or 2       | Trim 3           |
| Axer-Siegel, 1996 <sup>3</sup> |                        | 28.6 ± 4.6<br>range: 21 - 42                                                           | 8.2 (95% CI 7.6 - 8.7)                                                                  | 7.1 (95% CI 6.6 - 7.4)                                                                  | around conception | during pregnancy |
| Buchbinder, 2000 <sup>4</sup>  | Insulin lispro group   | 31.2 ± 6.3                                                                             | NR                                                                                      | NR                                                                                      | Trim 1 or 2       | early PP         |
|                                | Regular insulin group  | 27.0 ± 5.4                                                                             | NR                                                                                      | NR                                                                                      |                   |                  |
| Chew, 1995 <sup>5</sup>        |                        | 27.8 ± 4.1                                                                             | NR                                                                                      | NR                                                                                      | Trim 1            | early PP         |
| Dibble, 1982 <sup>6</sup>      |                        | range: 18 - 32                                                                         | NR                                                                                      | NR                                                                                      | Trim 1            | Trim 3           |
| Klein, 1990 <sup>7</sup>       |                        | 26.7 ± 4.8                                                                             | NR                                                                                      | NR                                                                                      | Trim 1            | Early PP         |
| Laatikainen, 1980 <sup>8</sup> |                        | NR                                                                                     | NR                                                                                      | NR                                                                                      | Trim 1            | Trim 3           |
| Lapolla, 1998 <sup>9</sup>     |                        | 29 ± 4.7                                                                               | 7.2 ± 1.6                                                                               | 6.4 ± 0.8                                                                               | Trim 1            | Trim 3           |
| Lauszus, 2003 <sup>10</sup>    |                        | 28 ± 5<br>range: 17 - 40                                                               | 7.5 ± 1.1<br>range 5.3 - 10.2                                                           | 7.5 ± 1.1<br>range: 5.5 - 11.8                                                          | Trim 1            | Trim 3           |
| Loukovaara, 2003 <sup>11</sup> | Insulin lispro group   | 30.0 ± 4.4                                                                             | 7.2                                                                                     | 6.5                                                                                     | Trim 1            | Trim 3           |
|                                | Regular insulin group  | 30.6 ± 4.7                                                                             | 7.5                                                                                     | 7.2                                                                                     |                   |                  |
| McElvy, 2001 <sup>12</sup>     |                        | no progressed group = 26.2 ± 5.1<br>progressed group = 25.4 ± 4.5                      | no progressed group = 9.2 ± 1.7<br>progressed group = 9.9 ± 1.8                         | no progressed group = 7.5 ± 1.3<br>progressed group = 7.7 ± 1.0                         | Trim 1 or 2       | Trim 3/early PP  |
| Moloney, 1982 <sup>13</sup>    |                        | 28.0 ± 0.6                                                                             | HMA present group = 9.4 ± 0.2 <sup>a</sup><br>HMA absent group = 8.6 ± 0.2 <sup>a</sup> | HMA present group = 8.4 ± 0.2 <sup>a</sup><br>HMA absent group = 8.2 ± 0.2 <sup>a</sup> | Trim 1            | Trim 3           |
| Phelps, 1986 <sup>14</sup>     |                        | no DR group = 25.2 ± 1.3<br>background DR group = 28.9 ± 0.9<br>PDR group = 23.8 ± 1.7 | NR                                                                                      | NR                                                                                      | Trim 1 or 2       | Trim 3/early PP  |
| Rahman, 2007 <sup>15</sup>     |                        | 23.5 ± 5.2<br>range: 18 - 34                                                           | 6.9 ± 1.5                                                                               | 6.3 ± 1.2                                                                               | Trim 1            | Trim 3           |

| Study                                                                                                                                                                                                                                                                                        | Subset characteristics | Maternal age (years) mean ± SD                                                                                                                  | Mean ± SD HbA1c level (%)                                                   |                                                                             | Eye exam timing |                 |
|----------------------------------------------------------------------------------------------------------------------------------------------------------------------------------------------------------------------------------------------------------------------------------------------|------------------------|-------------------------------------------------------------------------------------------------------------------------------------------------|-----------------------------------------------------------------------------|-----------------------------------------------------------------------------|-----------------|-----------------|
|                                                                                                                                                                                                                                                                                              |                        |                                                                                                                                                 | early pregnancy                                                             | around delivery                                                             | Early pregnancy | Late pregnancy  |
| Rosenn, 1992 <sup>16</sup>                                                                                                                                                                                                                                                                   |                        | no progressed group = 25.5 ± 4.6<br>progressed group = 25.6 ± 4.6                                                                               | no progressed group = 9.3 ± 1.6<br>progressed group = 10.3 ± 2.0            | no progressed group = 7.7 ± 1.2<br>progressed group = 7.7 ± 1.1             | Trim 1 or 2     | Trim 3/early PP |
| Vestgaard, 2010 <sup>17</sup>                                                                                                                                                                                                                                                                |                        | no progression group (-P) = median 31.5 (IQR: 28-34)<br>mild-mod progression group (+P) = 29 (27-32)<br>ST progression group (++P) = 29 (26-34) | -P = median 6.7 (IQR: 6.3-7.2)<br>+P = 6.5 (6.1-6.7)<br>++P = 7.4 (6.9-8.7) | -P = median 5.9 (IQR: 5.7-6.3)<br>+P = 5.9 (5.6-6.2)<br>++P = 5.7 (5.6-6.0) | Trim 1          | Trim 3          |
| <b>T2DM only</b>                                                                                                                                                                                                                                                                             |                        |                                                                                                                                                 |                                                                             |                                                                             |                 |                 |
| Rasmussen, 2010 <sup>18</sup>                                                                                                                                                                                                                                                                |                        | no progressed group = 32.5 ± 5.3<br>progressed group = 33.0 ± 5.8                                                                               | no progressed group = 6.5 ± 1.1<br>progressed group = 7.2 ± 1.2             | no progressed group = 5.7 ± 0.6<br>progressed group = 5.7 ± 0.6             | Trim 1 or 2     | Trim 3          |
| <b>Mixture of DM types</b>                                                                                                                                                                                                                                                                   |                        |                                                                                                                                                 |                                                                             |                                                                             |                 |                 |
| Hampshire, 2013 <sup>19</sup>                                                                                                                                                                                                                                                                |                        | 31                                                                                                                                              | NR                                                                          | NR                                                                          | Trim 1          | Trim 3          |
| Abbreviations: CI, confidence interval; DR, diabetic retinopathy; HMA, haemorrhages; mod, moderate; NR, not reported; PDR, proliferative diabetic retinopathy; PP, postpartum; SD, standard deviation; ST, sight-threatening; T1DM, type 1 diabetes; T2DM, type 2 diabetes; Trim, trimester. |                        |                                                                                                                                                 |                                                                             |                                                                             |                 |                 |
| ªAmong 49 participants with DR.                                                                                                                                                                                                                                                              |                        |                                                                                                                                                 |                                                                             |                                                                             |                 |                 |



**eTable 6.** Pooled Prevalence of Proliferative Diabetic Retinopathy Around Delivery

|                                                                                                                                                                                                                                                                                                                                   | <b>N studies</b>         | <b>Cases/Total</b> | <b>Prevalence per 100 (95% CI)</b> | <b>I<sup>2</sup> (%)</b> | <b>P-value</b> |
|-----------------------------------------------------------------------------------------------------------------------------------------------------------------------------------------------------------------------------------------------------------------------------------------------------------------------------------|--------------------------|--------------------|------------------------------------|--------------------------|----------------|
| <b>Study region</b>                                                                                                                                                                                                                                                                                                               |                          |                    |                                    |                          |                |
| Europe                                                                                                                                                                                                                                                                                                                            | 4 subsets from 3 studies | 6/183              | 2.30 (0.29 – 5.50)                 | 0.0                      | .47            |
| United States                                                                                                                                                                                                                                                                                                                     | 3 studies                | 68/398             | 16.92 (13.33 – 20.83)              | 0.0                      | .95            |
| <i>Between-subgroup heterogeneity</i>                                                                                                                                                                                                                                                                                             |                          |                    |                                    |                          | <.001          |
| <b>Study era</b>                                                                                                                                                                                                                                                                                                                  |                          |                    |                                    |                          |                |
| Pre-St. Vincent Declaration                                                                                                                                                                                                                                                                                                       | 3 studies                | 68/398             | 16.92 (13.33 – 20.83)              | 0.0                      | .95            |
| Post-St. Vincent Declaration                                                                                                                                                                                                                                                                                                      | 4 subsets from 3 studies | 6/183              | 2.30 (0.29 – 5.50)                 | 0.0                      | .47            |
| <i>Between-subgroup heterogeneity</i>                                                                                                                                                                                                                                                                                             |                          |                    |                                    |                          | <.001          |
| <b>DR grading methods</b>                                                                                                                                                                                                                                                                                                         |                          |                    |                                    |                          |                |
| Modified Airlie House                                                                                                                                                                                                                                                                                                             | 3 studies                | 68/398             | 16.92 (13.33 – 20.83)              | 0.0                      | .95            |
| ETDRS                                                                                                                                                                                                                                                                                                                             | 3 subsets from 2 studies | 2/80               | 1.28 (0.00 – 6.43)                 | 12.3                     | .32            |
| WESDR                                                                                                                                                                                                                                                                                                                             | 1 study                  | 4/103              | 3.88 (1.07 – 9.65)                 | NA                       | NA             |
| <i>Between-subgroup heterogeneity</i>                                                                                                                                                                                                                                                                                             |                          |                    |                                    |                          | <.001          |
| Abbreviations: DR, diabetic retinopathy; ETDRS, Early Treatment Diabetic Retinopathy Study; NA, not applicable; WESDR, Wisconsin Epidemiologic Study of Diabetic Retinopathy.<br><sup>a</sup> Type 1 diabetes studies only, by subgroups of interest, using studies with similar quality and diabetic retinopathy grading scheme. |                          |                    |                                    |                          |                |

**eTable 7.** Pooled Progression Rate of Nonproliferative Diabetic Retinopathy Worsening by at Least 1 Level

|                                                                                                                                                                                                                                                                                                                | <b>N studies</b>                       | <b>Cases/Total</b> | <b>Progression rate per 100 (95% CI)</b> | <b>I<sup>2</sup> (%)</b> | <b>P-value</b> |
|----------------------------------------------------------------------------------------------------------------------------------------------------------------------------------------------------------------------------------------------------------------------------------------------------------------|----------------------------------------|--------------------|------------------------------------------|--------------------------|----------------|
| <b>Type of diabetes</b>                                                                                                                                                                                                                                                                                        |                                        |                    |                                          |                          |                |
| T1DM                                                                                                                                                                                                                                                                                                           | 16 subsets from 15 studies             | 214/639            | 30.61 (22.38 – 39.45)                    | 77.8                     | <.01           |
| T2DM                                                                                                                                                                                                                                                                                                           | 2 studies                              | 12/34              | 34.71 (19.09 – 52.01)                    | 0.0                      | .              |
| <i>Between-subgroup heterogeneity</i>                                                                                                                                                                                                                                                                          |                                        |                    |                                          |                          | .660           |
| <b>Study region</b>                                                                                                                                                                                                                                                                                            |                                        |                    |                                          |                          |                |
| Europe                                                                                                                                                                                                                                                                                                         | 8 subsets from 7 studies <sup>b</sup>  | 63/233             | 26.43 (18.92 – 34.62)                    | 36.4                     | .14            |
| Middle East                                                                                                                                                                                                                                                                                                    | 2 studies                              | 21/42              | 49.85 (34.45 – 65.26)                    | 0.0                      | .              |
| United States                                                                                                                                                                                                                                                                                                  | 8 subsets from 7 studies               | 142/398            | 31.42 (20.15 – 43.78)                    | 80.1                     | <.01           |
| <i>Between-subgroup heterogeneity</i>                                                                                                                                                                                                                                                                          |                                        |                    |                                          |                          | .031           |
| <b>Study era</b>                                                                                                                                                                                                                                                                                               |                                        |                    |                                          |                          |                |
| Pre-St. Vincent Declaration                                                                                                                                                                                                                                                                                    | 8 studies                              | 170/425            | 42.77 (31.63 – 54.27)                    | 79.9                     | <.01           |
| Post-St. Vincent Declaration                                                                                                                                                                                                                                                                                   | 10 subsets from 8 studies <sup>b</sup> | 56/248             | 20.51 (13.79 – 28.01)                    | 33.7                     | .14            |
| <i>Between-subgroup heterogeneity</i>                                                                                                                                                                                                                                                                          |                                        |                    |                                          |                          | .002           |
| <b>DR grading methods</b>                                                                                                                                                                                                                                                                                      |                                        |                    |                                          |                          |                |
| Modified Airlie House                                                                                                                                                                                                                                                                                          | 6 subsets from 5 studies               | 111/311            | 31.62 (17.32 – 47.69)                    | 83.8                     | <.01           |
| WESDR/ modified WESDR                                                                                                                                                                                                                                                                                          | 3 studies <sup>b</sup>                 | 29/127             | 22.34 (15.13 – 30.43)                    | 2.9                      | .357           |
| ETDRS                                                                                                                                                                                                                                                                                                          | 2 studies                              | 5/27               | 17.90 (4.48 – 35.99)                     | 0.0                      | .              |
| Eurodiab                                                                                                                                                                                                                                                                                                       | 1 study                                | 2/15               | 13.33 (1.66 - 40.46)                     | NA                       | NA             |
| UK NSCG                                                                                                                                                                                                                                                                                                        | 2 subsets from 1 study <sup>b</sup>    | 18/52              | 34.26 (21.64 - 48.01)                    | 0.0                      | .              |
| Other                                                                                                                                                                                                                                                                                                          | 4 studies                              | 61/141             | 43.41 (23.20 - 64.76)                    | 82.5                     | <.01           |
| <i>Between-group heterogeneity</i>                                                                                                                                                                                                                                                                             |                                        |                    |                                          |                          | .175           |
| Abbreviations: DR, diabetic retinopathy; ETDRS, Early Treatment Diabetic Retinopathy Study; NA, not applicable; T1DM, type 1 diabetes mellitus; T2DM, type 2 diabetes mellitus; UK NSCG, United Kingdom National Screening Committee guidelines; WESDR, Wisconsin Epidemiologic Study of Diabetic Retinopathy. |                                        |                    |                                          |                          |                |
| <sup>a</sup> In both diabetes type, by subgroups of interest, using studies with similar quality.                                                                                                                                                                                                              |                                        |                    |                                          |                          |                |
| <sup>b</sup> Includes the T2DM study.                                                                                                                                                                                                                                                                          |                                        |                    |                                          |                          |                |

**eTable 8.** Comparison of Pooled Estimates Between Freeman-Tukey Double Arcsine Transformation and Random Intercept Mixed-Effects Logistic Regression Model

|                                |                 | Rate per 100 pregnancies (95%CI)                                                   |                                                                                              |
|--------------------------------|-----------------|------------------------------------------------------------------------------------|----------------------------------------------------------------------------------------------|
|                                |                 | metaprop_one command with Freeman-Tukey double arcsine transformation option (FTT) | metapreg command for a random intercept mixed-effects logistic regression model <sup>*</sup> |
| <b>Prevalence<sup>a</sup></b>  |                 |                                                                                    |                                                                                              |
| Any DR                         | early pregnancy | 55.5 (38.9 – 71.6)                                                                 | 55.2 (39.7 - 69.8)                                                                           |
|                                | around delivery | 59.5 (36.1 – 80.8)                                                                 | 59.7 (39.5 - 77.1)                                                                           |
| PDR                            | early pregnancy | 6.0 (2.2 - 11.2)                                                                   | 5.4 (2.2 - 12.7)                                                                             |
|                                | around delivery | 6.4 (1.7 - 13.4)                                                                   | 6.2 (2.6 - 14.3)                                                                             |
| <b>Progression<sup>b</sup></b> |                 |                                                                                    |                                                                                              |
| None to any DR                 |                 | 15.0 (9.9 - 20.8)                                                                  | 15.8 (11.3 - 21.6)                                                                           |
| Worsened NPDR                  |                 | 30.9 (23.3 - 39.2)                                                                 | 30.3 (22.1 - 40.0)                                                                           |
| NPDR to PDR                    |                 | 6.3 (3.3 - 10.0)                                                                   | 8.2 (5.5 - 11.8)                                                                             |
| Worsened PDR                   |                 | 37.0 (21.2 - 54.0)                                                                 | 38.2 (24.4 - 54.3)                                                                           |

\*random intercept logistic regression model described in Stijnen *et al.*<sup>20</sup>

[using Stata command metapreg, and confirmed using Stata command: meglm case || study: , family(binom denom) link(logit)]

<sup>a</sup> studies with similar quality and grading scheme.

<sup>b</sup> studies with similar quality

**eFigure 1.** Systematic Search and Selection of Eligible Literature

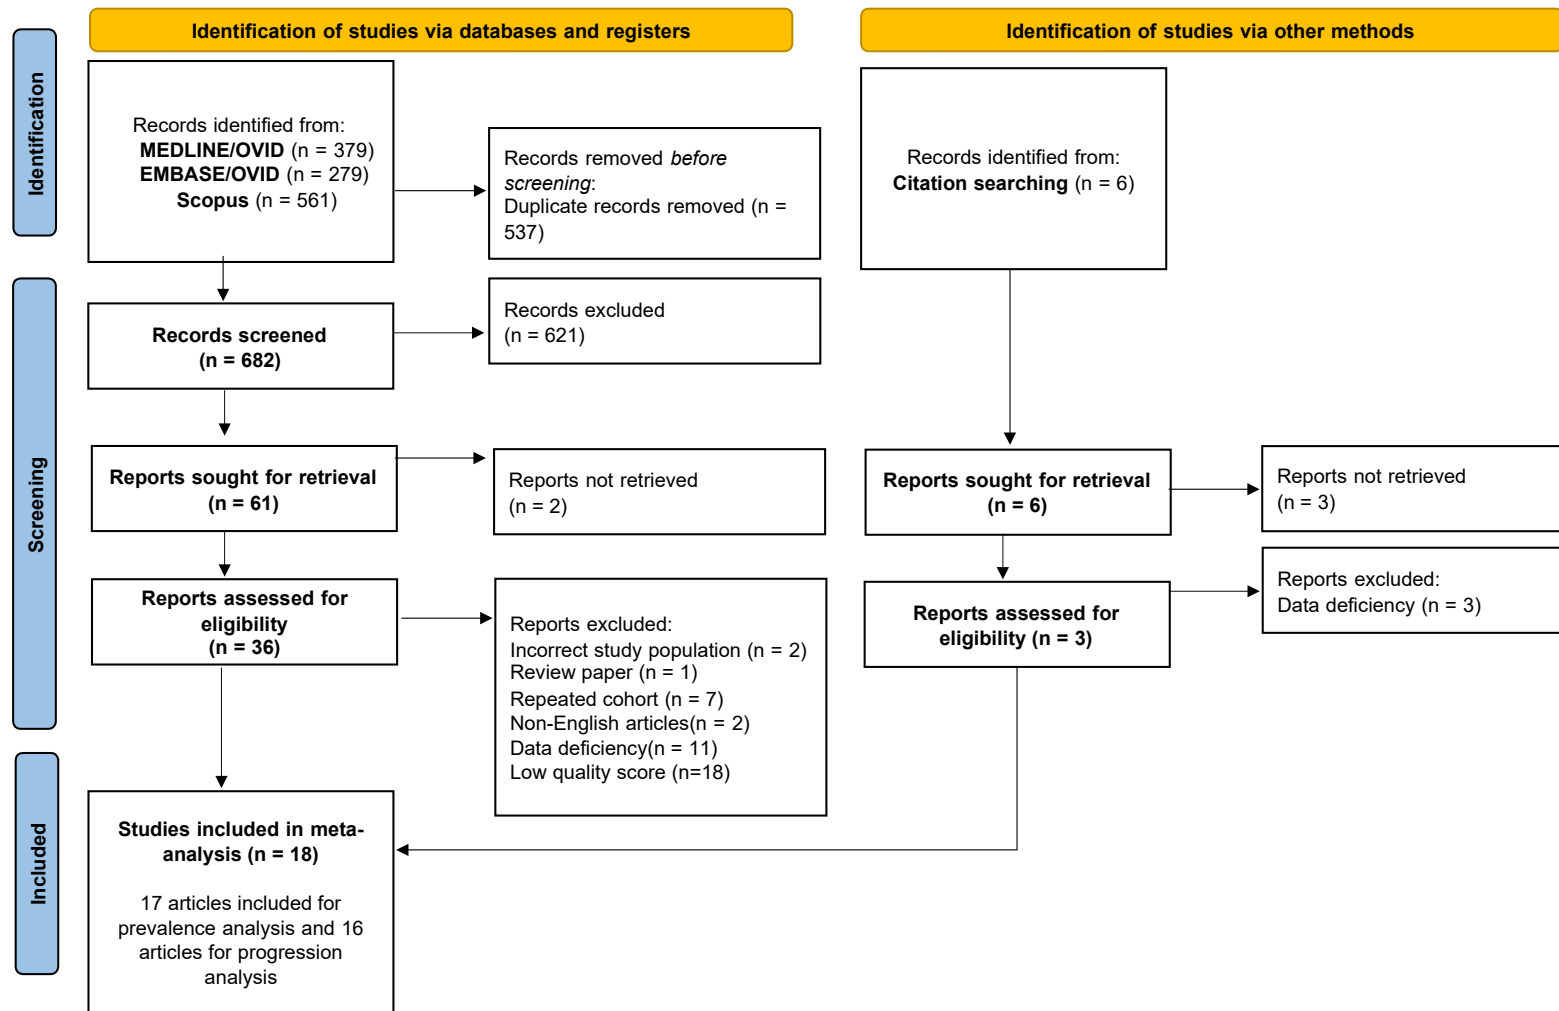

**eFigure 2.** Forest Plots of Prevalence of any DR Using Studies With Similar Quality, by Type of Diabetes

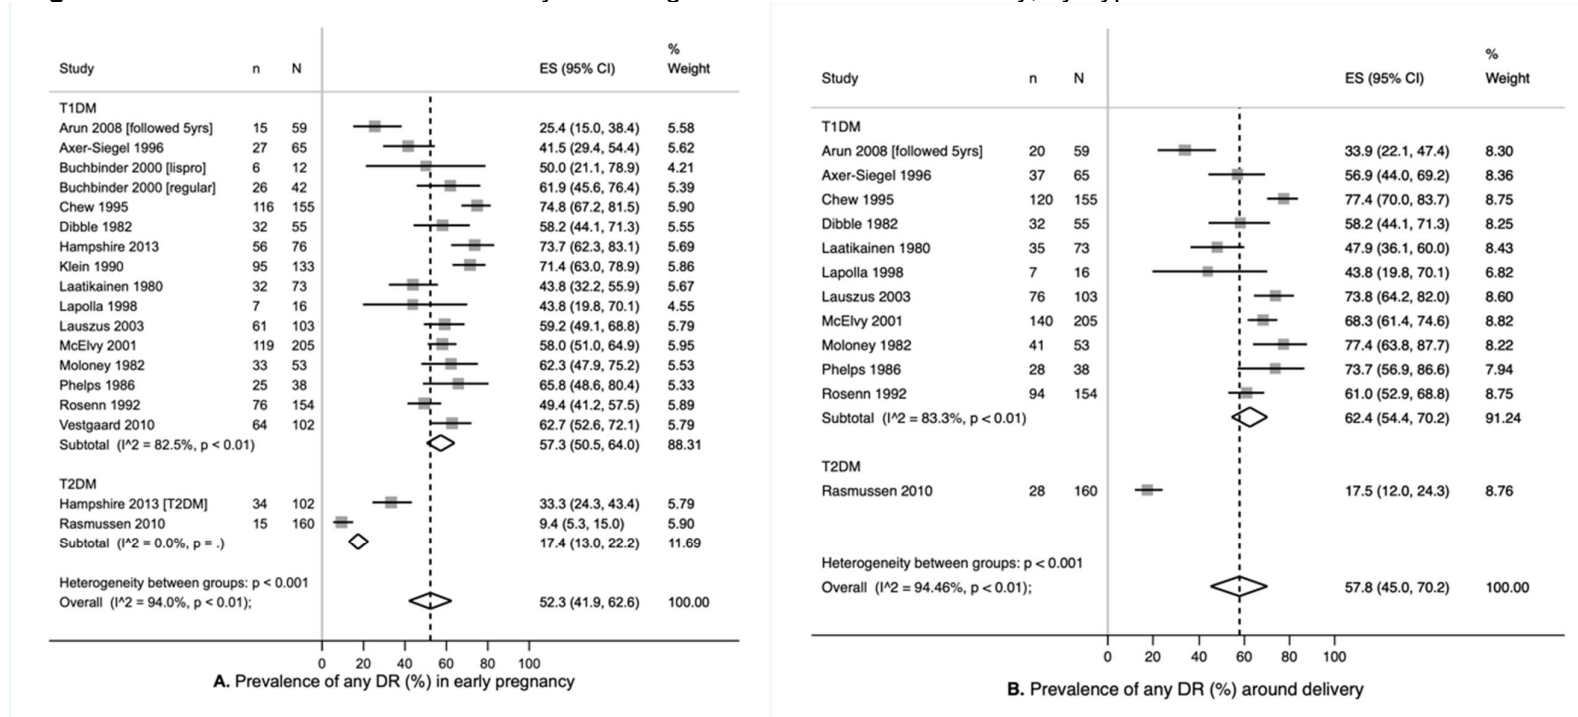

CI, confidence interval; DR, diabetic retinopathy; ES, effect size; T1DM, type 1 diabetes; T2DM, type 2 diabetes.

Weights are from random effects analysis.

<sup>a</sup> Quality score for prevalence  $\geq 9$

**eFigure 3.** Forest Plots of Prevalence of PDR Using Studies With Similar Quality, by Type of Diabetes

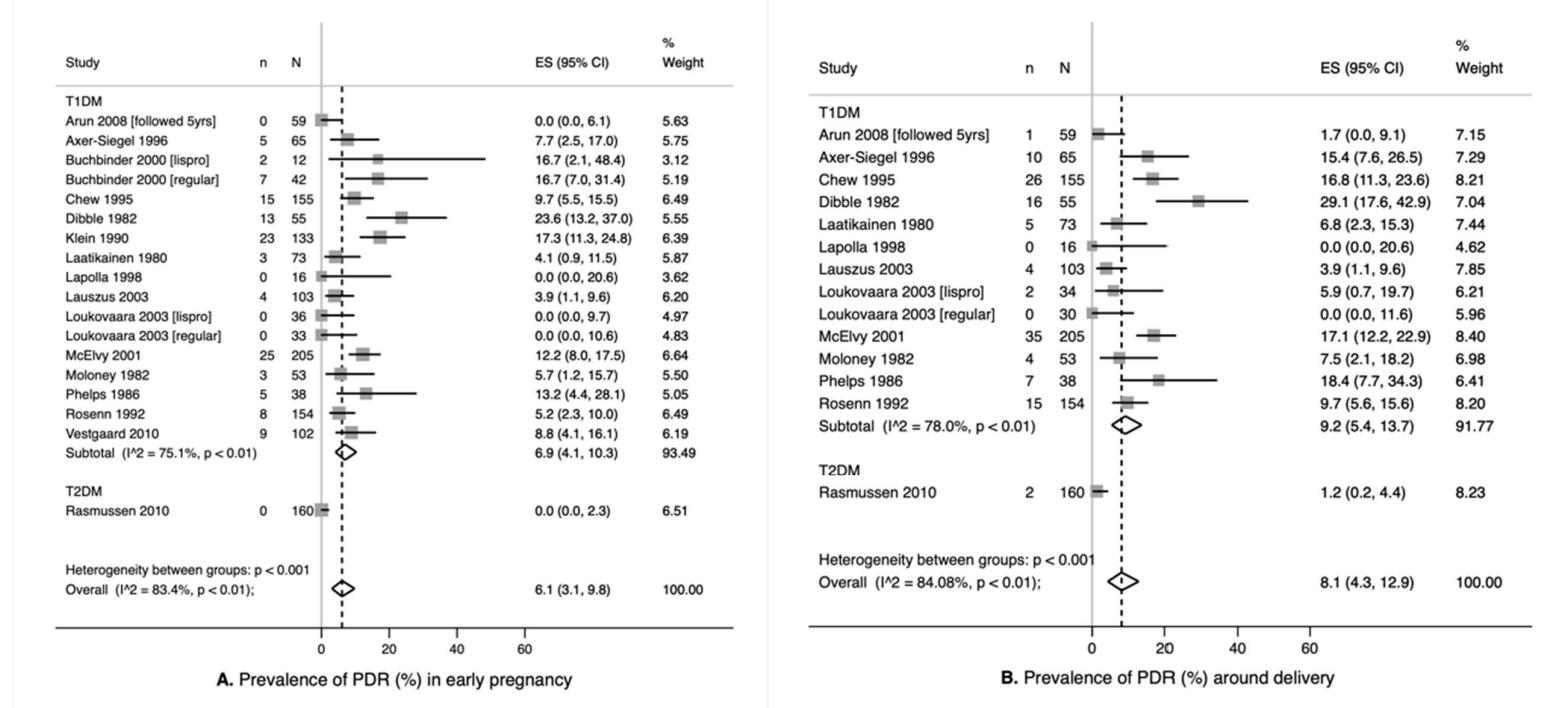

CI, confidence interval; ES, effect size; PDR, proliferative diabetic retinopathy; T1DM, type 1 diabetes; T2DM, type 2 diabetes.

Weights are from random effects analysis.

<sup>a</sup> Quality score for prevalence  $\geq 9$

**eFigure 4.** Forest Plots of Prevalence of any DR Using Studies With Similar Quality and DR Grading Scheme, by Diabetes Type

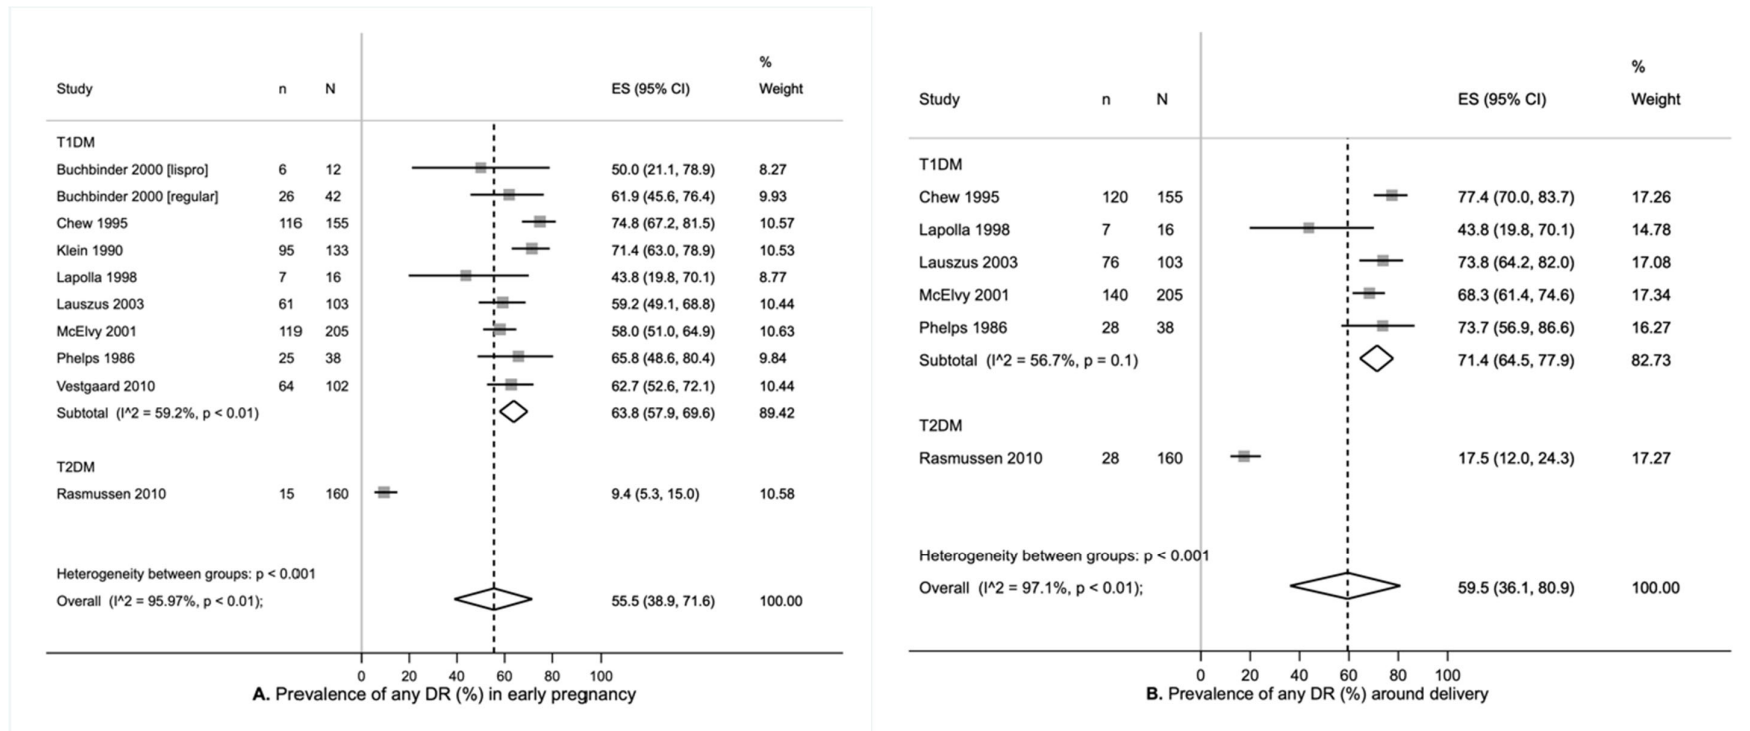

CI, confidence interval; DR, diabetic retinopathy; ES, effect size; T1DM, type 1 diabetes; T2DM, type 2 diabetes.

Weights are from random effects analysis.

<sup>a</sup> Quality score for prevalence  $\geq 9$

<sup>b</sup> The ETDRS grading system or its modifications including modified Airlie House, WESDR, and modified WESDR methods

**eFigure 5.** Forest Plots of Prevalence of PDR Using Studies With Similar Quality and DR Grading Scheme, by Type of Diabetes

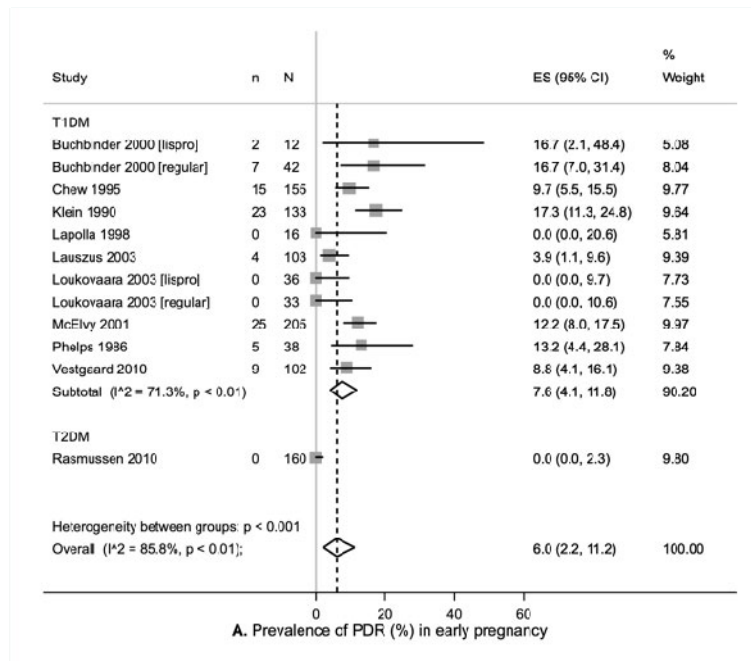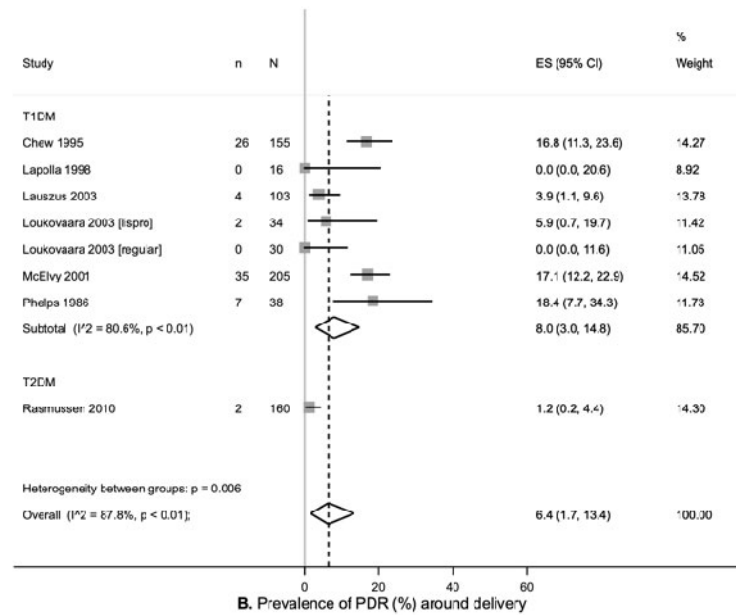

CI, confidence interval; ES, effect size; PDR, proliferative diabetic retinopathy; T1DM, type 1 diabetes; T2DM, type 2 diabetes.

Weights are from random effects analysis.

<sup>a</sup> Quality score for prevalence  $\geq 9$

<sup>b</sup> The ETDRS grading system or its modifications including modified Airlie House, WESDR, and modified WESDR methods



## eReferences

1. Lauszus F, Klebe JG, Bek T. Diabetic retinopathy in pregnancy during tight metabolic control. *Acta Obstetrica et Gynecologica Scandinavica*. 2000;79(5):367-370.
2. Arun CS, Taylor R. Influence of pregnancy on long-term progression of retinopathy in patients with type 1 diabetes. *Diabetologia*. 2008;51(6):1041-1045. doi:10.1007/s00125-008-0994-z.
3. Axer-Siegel R, Hod M, Fink-Cohen S, et al. Diabetic retinopathy during pregnancy. *Ophthalmology*. 1996;103(11):1815-1819. doi:10.1016/s0161-6420(96)30421-1.
4. Buchbinder A, Miodovnik M, McElvy S, et al. Is insulin lispro associated with the development or progression of diabetic retinopathy during pregnancy? *Am J Obstet Gynecol*. 2000;183(5):1162-1165. doi:10.1067/mob.2000.108893.
5. Chew EY, Mills JL, Metzger BE, et al. Metabolic control and progression of retinopathy: The Diabetes in Early Pregnancy Study. *Diabetes Care*. 1995;18(5):631-637. doi:10.2337/diacare.18.5.631.
6. Dibble CM, Kochenour NK, Worley RJ, Tyler FH, Swartz M. Effect of pregnancy on diabetic retinopathy. *Obstet Gynecol*. 1982;59(6):699-704.
7. Klein BE, Moss SE, Klein R. Effect of pregnancy on progression of diabetic retinopathy. *Diabetes Care*. 1990;13(1):34-40. doi:10.2337/diacare.13.1.34.
8. Laatikainen L, Larinkari J, Teramo K, Raivio KO. Occurrence and prognostic significance of retinopathy in diabetic pregnancy. *Metab Pediatr Ophthalmol*. 1980;4(4):191-195.
9. Lapolla A, Cardone C, Negrin P, et al. Pregnancy does not induce or worsen retinal and peripheral nerve dysfunction in insulin-dependent diabetic women. *J Diabetes Complications*. 1998;12(2):74-80. doi:10.1016/s1056-8727(97)00002-0.
10. Lauszus FF, Klebe JG, Bek T, Flyvbjerg A. Increased serum IGF-I during pregnancy is associated with progression of diabetic retinopathy. *Diabetes*. 2003;52(3):852-856. doi:10.2337/diabetes.52.3.852.
11. Loukovaara S, Immonen I, Teramo KA, Kaaja R. Progression of retinopathy during pregnancy in type 1 diabetic women treated with insulin lispro. *Diabetes Care*. 2003;26(4):1193-1198. doi:10.2337/diacare.26.4.1193.
12. McElvy SS, Demarini S, Miodovnik M, Khoury JC, Rosenn B, Tsang RC. Fetal weight and progression of diabetic retinopathy. *Obstet Gynecol*. 2001;97(4):587-592. doi:10.1016/s0029-7844(00)01202-3.
13. Moloney JB, Drury MI. The effect of pregnancy on the natural course of diabetic retinopathy. *Am J Ophthalmol*. 1982;93(6):745-756. doi:10.1016/0002-9394(82)90471-8.
14. Phelps RL, Sakol P, Metzger BE, Jampol LM, Freinkel N. Changes in Diabetic Retinopathy During Pregnancy Correlations with Regulation of Hyperglycemia. *Arch Ophthalmol*. 1986;104(12):1806-1810. doi:10.1001/archopht.1986.01050240080044.
15. Rahman W, Rahman FZ, Yassin S, Al-Suleiman SA, Rahman J. Progression of retinopathy during pregnancy in type 1 diabetes mellitus. *Clin Exp Ophthalmol*. 2007;35(3):231-236. doi:10.1111/j.1442-9071.2006.01413.x.
16. Rosenn B, Miodovnik M, Kranias G, et al. Progression of diabetic retinopathy in pregnancy: association with hypertension in pregnancy. *Am J Obstet Gynecol*. 1992;166(4):1214-1218. doi:10.1016/s0002-9378(11)90608-5.
17. Vestgaard M, Ringholm L, Laugesen CS, Rasmussen KL, Damm P, Mathiesen ER. Pregnancy-induced sight-threatening diabetic retinopathy in women with Type 1 diabetes. *Diabet Med*. 2010;27(4):431-435. doi:10.1111/j.1464-5491.2010.02958.x.

18. Rasmussen KL, Laugesen CS, Ringholm L, Vestgaard M, Damm P, Mathiesen ER. Progression of diabetic retinopathy during pregnancy in women with type 2 diabetes. *Diabetologia*. 2010;53(6):1076-1083. doi:10.1007/s00125-010-1697-9.
19. Hampshire R, Wharton H, Leigh R, Wright A, Dodson P. Screening for diabetic retinopathy in pregnancy using photographic review clinics. *Diabet Med*. 2013;30(4):475-477. doi:10.1111/dme.12077.
20. Stijnen T, Hamza TH, Ozdemir P. Random effects meta-analysis of event outcome in the framework of the generalized linear mixed model with applications in sparse data. *Stat Med*. 2010;29(29):3046-67.
